# Supplementary material for: circPHIP promotes oral squamous cell carcinoma progression by sponging miR-142-5p and regulating PHIP and ACTN4 expression
Source: PubMed Central journal article supplement — Mol Ther Nucleic Acids. 2020 Nov 4;23:185–99. doi: 10.1016/j.omtn.2020.10.038 (PMC7744814; doi:10.1016/j.omtn.2020.10.038), 2020-11-04
Supplement: mmc1.pdf [file mmc1.pdf]

OMTN, Volume 23

## Supplemental Information

**circPHIP promotes oral squamous cell carcinoma  
progression by sponging miR-142-5p  
and regulating PHIP and ACTN4 expression**

**Wen Su, Yuehong Shen, Yufan Wang, Feng Wang, Xia Hong, Yuling Chen, Yuntao Lin, and Hongyu Yang**

## Supplementary Figure 1

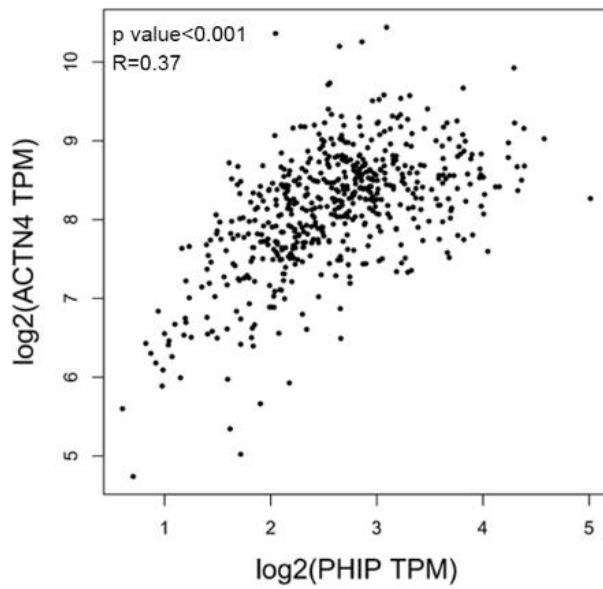

**Supplementary Figure 1** Bioinformatics analysis of the correlation between PHIP and ACTN4 expression in head and neck tumors.

## Supplementary Figure 2

a

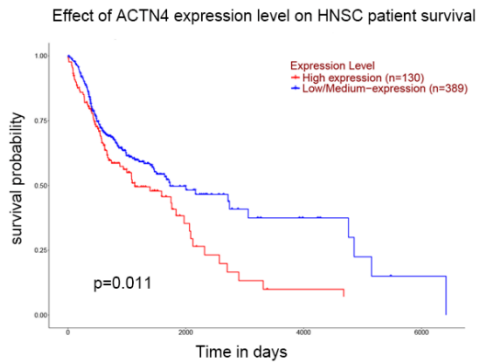

Expression of ACTN4 in HNSC based on HPV status

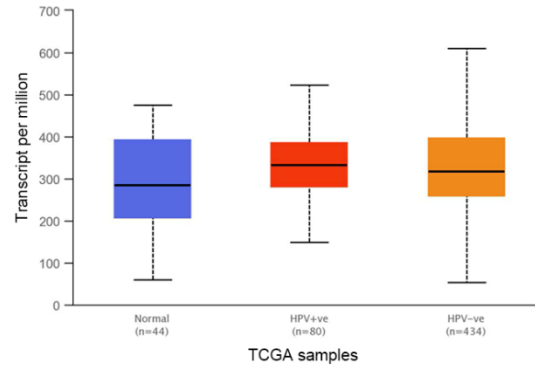

b

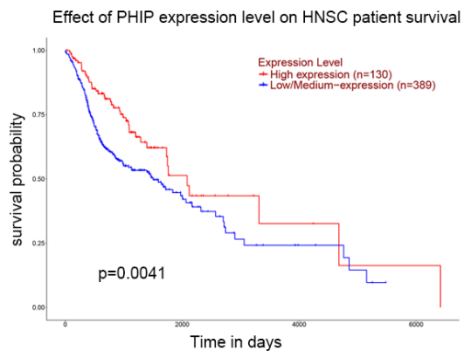

Expression of PHIP in HNSC based on HPV status

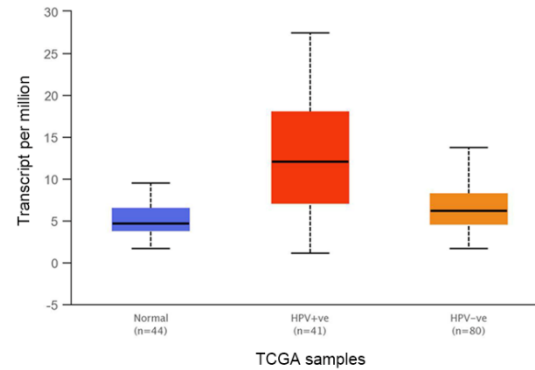

**Supplementary Figure 2 a, b** TCGA database analysis of the relationship between ACTN4 (a) or PHIP (b) expression and patient prognosis and HPV infection.

Supplementary Table 1 Correlation between clinicopathological features of patients with OSCC and circPHIP expression.

| Parameter                    | No. of patients | Mean $\pm$ SEM     | P value  |
|------------------------------|-----------------|--------------------|----------|
| <b>Gender</b>                |                 |                    |          |
| Male                         | 38              | 11.38 $\pm$ 0.3444 | 0.8716   |
| Female                       | 24              | 11.30 $\pm$ 0.3132 |          |
| <b>Age (yr)</b>              |                 |                    |          |
| <60                          | 25              | 11.66 $\pm$ 0.3292 | 0.3008   |
| $\geq$ 60                    | 37              | 11.14 $\pm$ 0.3379 |          |
| <b>Tumor size (cm)</b>       |                 |                    |          |
| <5                           | 52              | 11.35 $\pm$ 0.2633 | 0.9881   |
| $\geq$ 5                     | 10              | 11.34 $\pm$ 0.6427 |          |
| <b>Differentiation grade</b> |                 |                    |          |
| Well-moderate                | 40              | 11.60 $\pm$ 0.3184 | 0.1657   |
| Poor-undifferentiated        | 22              | 10.89 $\pm$ 0.3476 |          |
| <b>Lymph node status</b>     |                 |                    |          |
| Negative                     | 29              | 10.73 $\pm$ 0.3649 | 0.0149*  |
| Positive                     | 33              | 11.89 $\pm$ 0.2951 |          |
| <b>TNM stage</b>             |                 |                    |          |
| I-II                         | 36              | 10.74 $\pm$ 0.3108 | 0.0023** |
| III-IV                       | 26              | 12.19 $\pm$ 0.3218 |          |
| <b>HPV stage</b>             |                 |                    |          |
| Negative                     | 48              | 10.98 $\pm$ 0.2669 | 0.0037** |
| Positive                     | 14              | 12.62 $\pm$ 0.4139 |          |
